# Supplementary material for: Chemerin Stimulates the Secretory Activity of BME-UV1 Bovine Mammary Epithelial Cells
Source: MDPI journal article supplement (doi:10.3390/ijms25084147), 2024-04-09
Supplement: s1 [file s1]

**Table S1.** Data from the experiment determining the concentration of  $\alpha$ S1-casein in cells and conditioned media collected after 24h culture was analyzed by one-way analysis of variance (ANOVA) with Tukey's multiple comparison post-test. The effect of adiponectin, chemerin and leptin was compared to basic control conditions and to prolactin (PRL) treatment that was used as a positive control. Table S1 presents information about the adjusted P values for comparisons that were declared statistically significant ( $p \leq 0.05$ ).

| <b>Adjusted P values for experiment determining the concentration of <math>\alpha</math>S1-casein in cells</b>             |                        |                         |
|----------------------------------------------------------------------------------------------------------------------------|------------------------|-------------------------|
| <b>Tukey's multiple comparisons test</b>                                                                                   | <b>Mean Difference</b> | <b>Adjusted P Value</b> |
| Ctrl. vs. L100                                                                                                             | 174.7                  | 0.0485                  |
| PRL vs. Ctrl.                                                                                                              | 277.4                  | 0.0426                  |
| PRL vs. L10                                                                                                                | 373.9                  | 0.0014                  |
| PRL vs. L100                                                                                                               | 452.1                  | <0.0001                 |
| PRL vs. A10                                                                                                                | 362.4                  | 0.0022                  |
| PRL vs. A500                                                                                                               | 291.8                  | 0.0169                  |
| Ch100 vs. Ctrl.                                                                                                            | 273.6                  | 0.0479                  |
| Ch100 vs. L10                                                                                                              | 370.1                  | 0.0016                  |
| Ch100 vs. L100                                                                                                             | 448.3                  | <0.0001                 |
| Ch100 vs. A10                                                                                                              | 358.6                  | 0.0026                  |
| Ch100 vs. A500                                                                                                             | 288.0                  | 0.0194                  |
| A500 vs. L100                                                                                                              | 160.3                  | 0.0495                  |
| <b>Adjusted P values for experiment determining the concentration of <math>\alpha</math>S1-casein in conditioned media</b> |                        |                         |
| <b>Tukey's multiple comparisons test</b>                                                                                   | <b>Mean Difference</b> | <b>Adjusted P Value</b> |
| PRL vs. Ctrl.                                                                                                              | 21.17                  | 0.0181                  |
| PRL vs. L10                                                                                                                | 22.22                  | 0.0052                  |
| PRL vs. L100                                                                                                               | 22.22                  | 0.0052                  |
| PRL vs. A10                                                                                                                | 23.53                  | 0.0025                  |
| PRL vs. A500                                                                                                               | 15.30                  | 0.0159                  |
| Ch100 vs. Ctrl.                                                                                                            | 19.14                  | 0.0251                  |
| Ch100 vs. L10                                                                                                              | 20.19                  | 0.0064                  |
| Ch100 vs. L100                                                                                                             | 20.19                  | 0.0064                  |
| Ch100 vs. A10                                                                                                              | 21.50                  | 0.0030                  |
| Ch100 vs. A500                                                                                                             | 13.27                  | 0.0203                  |
